# Supplementary material for: A longitudinal study of the infant nasopharyngeal microbiota: The effects of age, illness and antibiotic use in a cohort of South East Asian children
Source: PubMed Central journal article supplement (PMC5638608; doi:10.1371/journal.pntd.0005975), 2017-10-02
Supplement: pntd.0005975.s001.pdf [file pntd.0005975.s001.pdf]

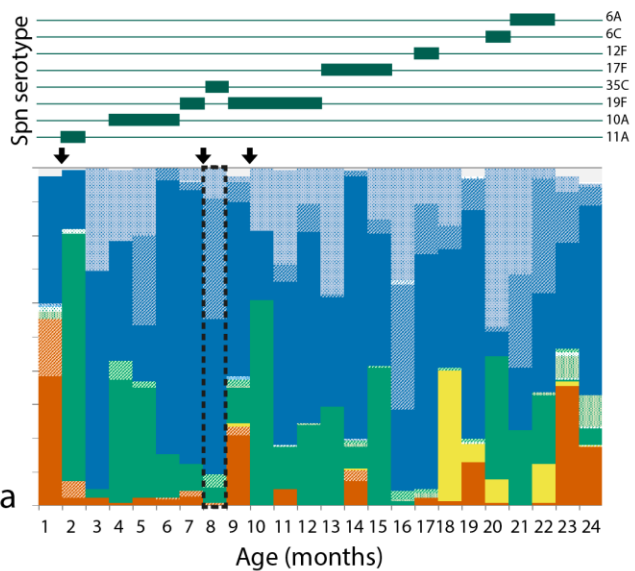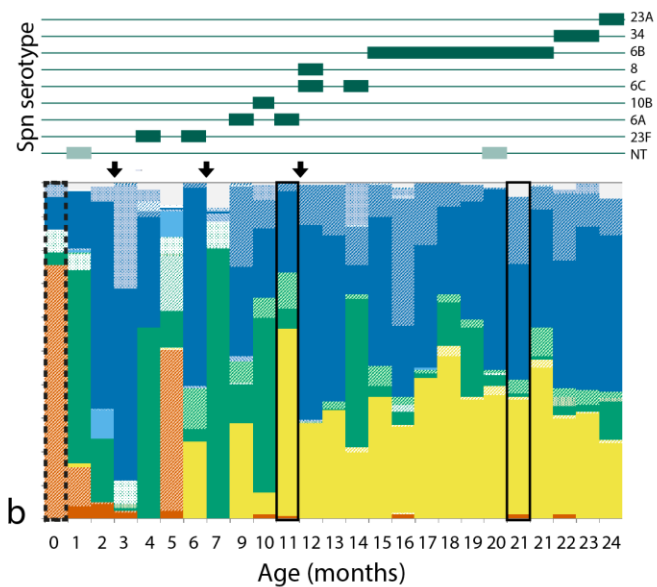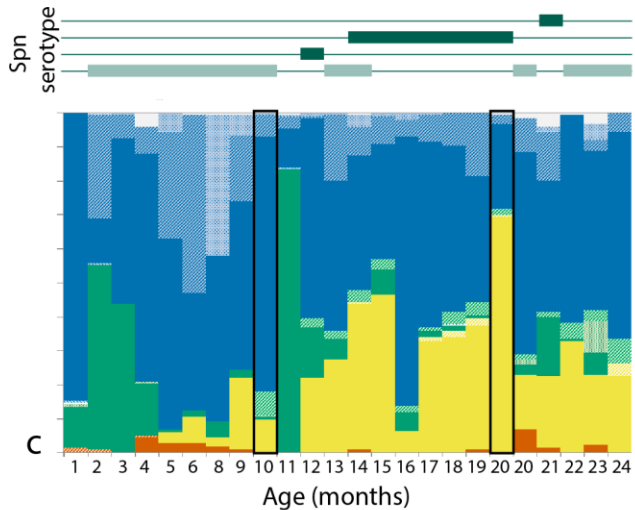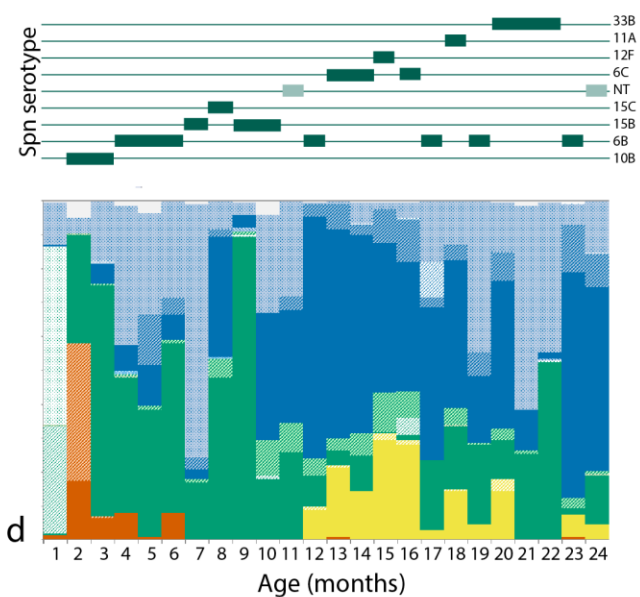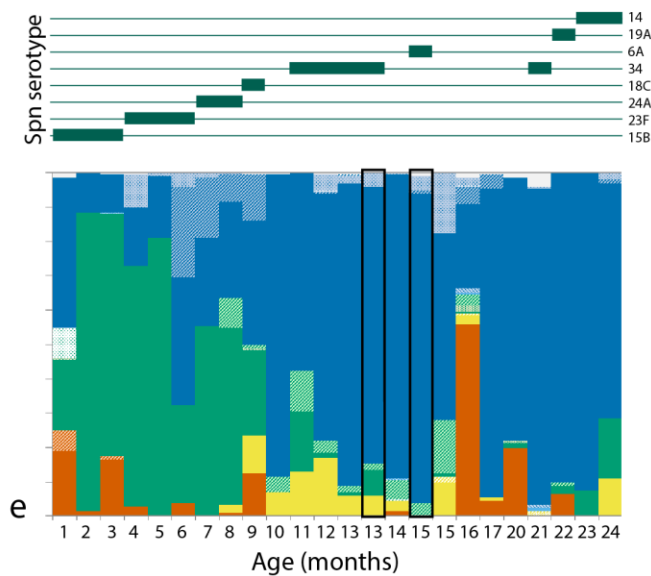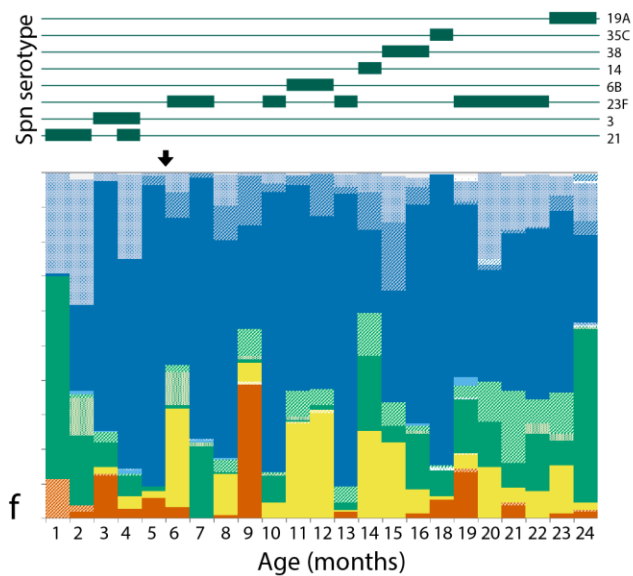

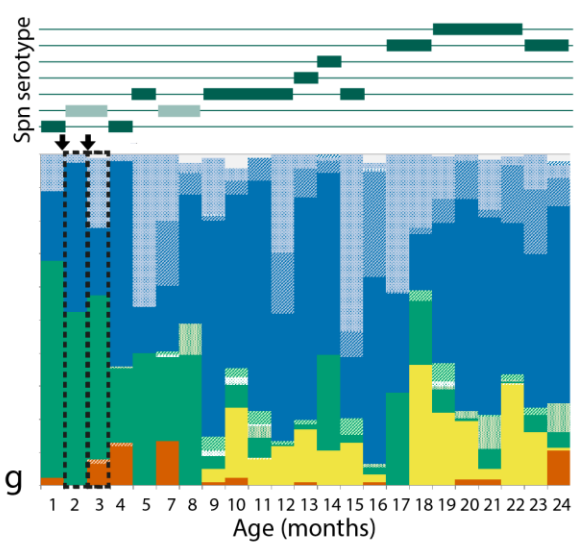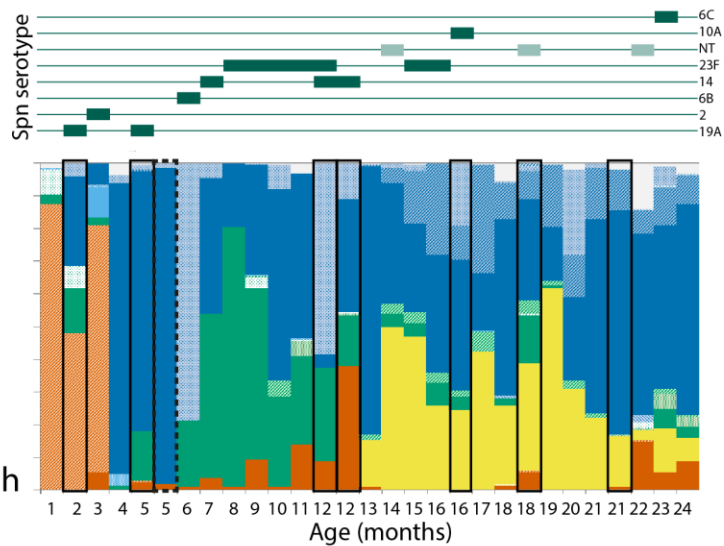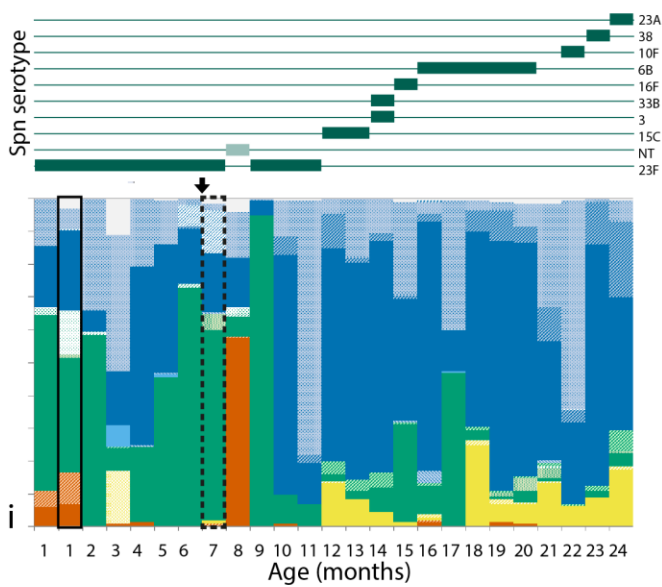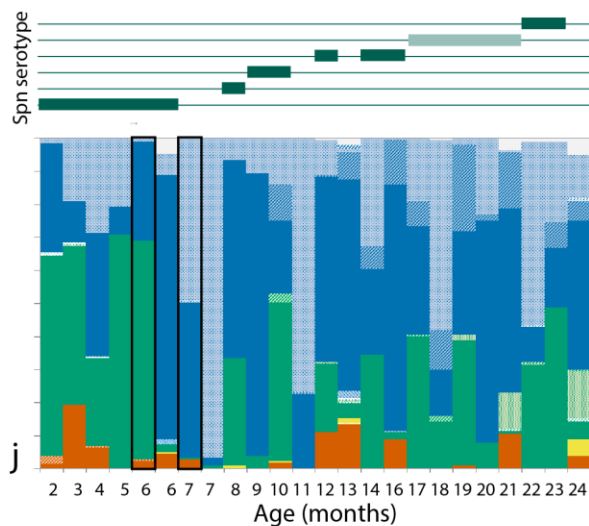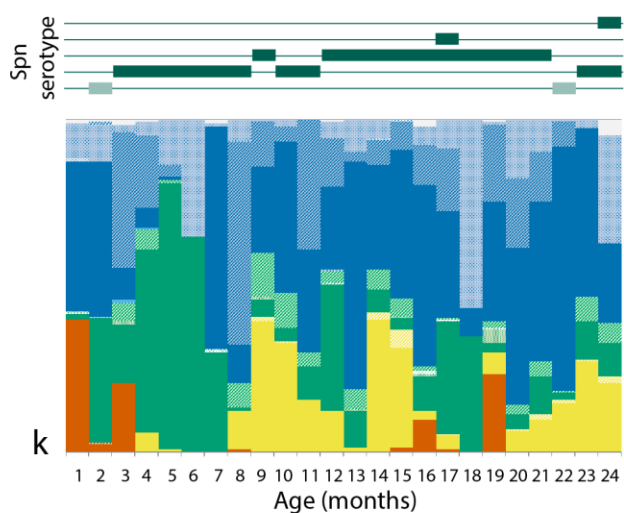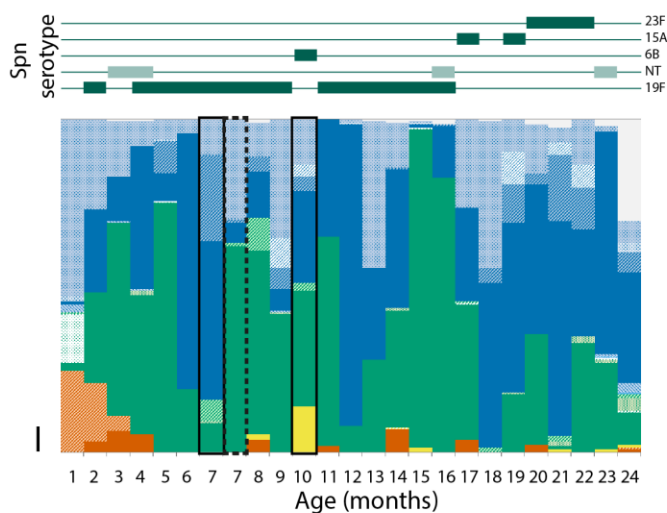

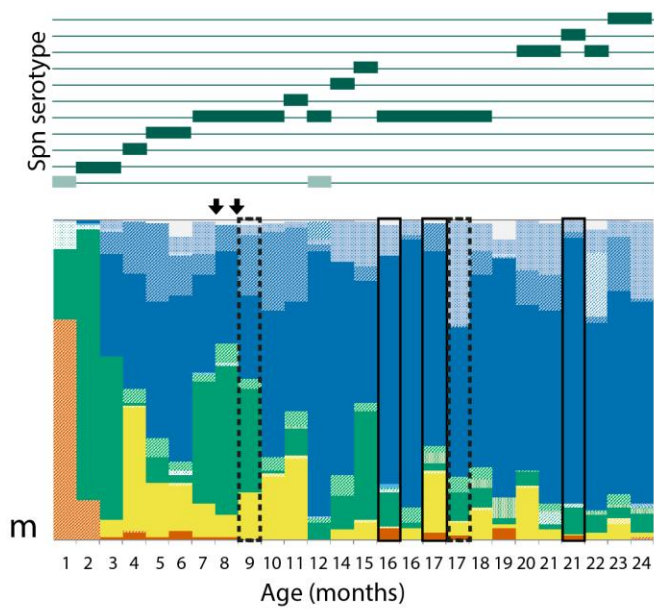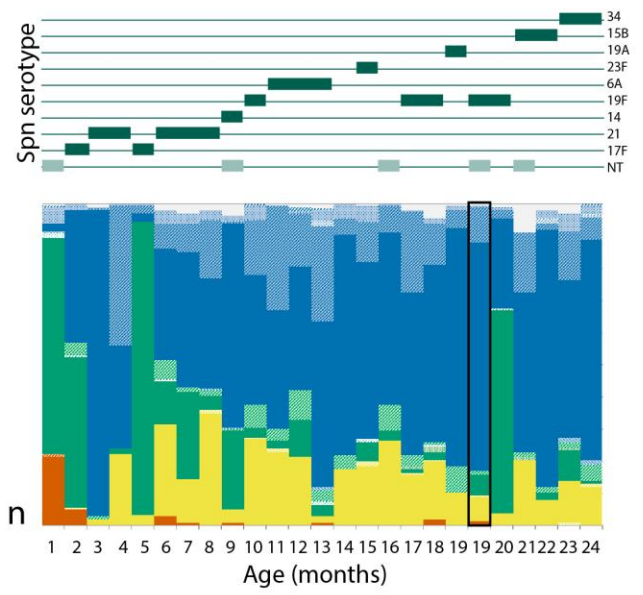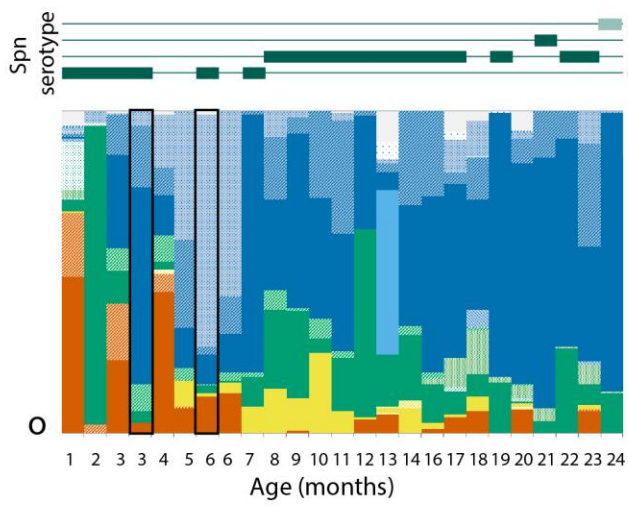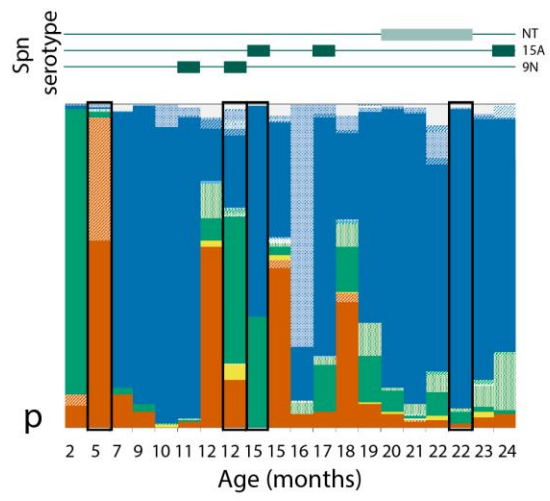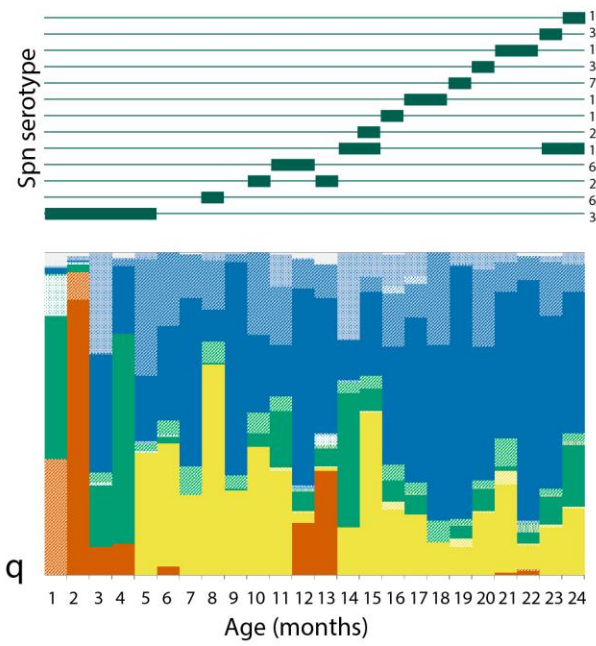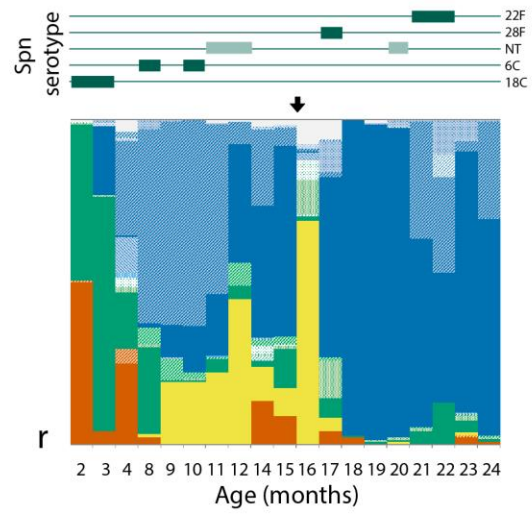

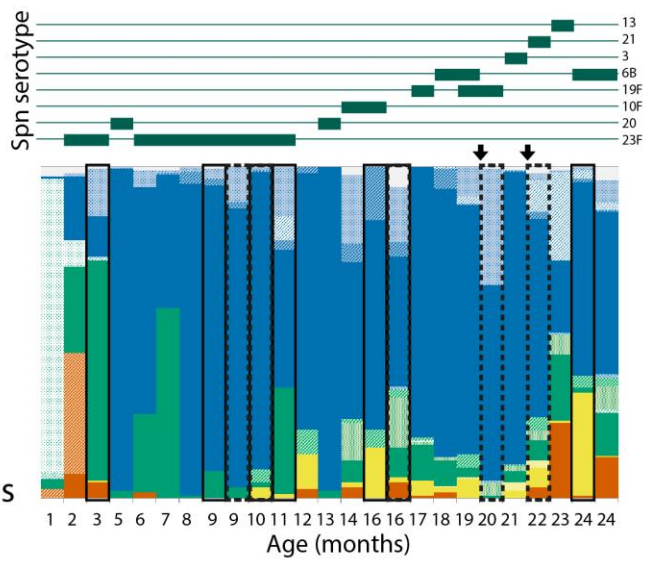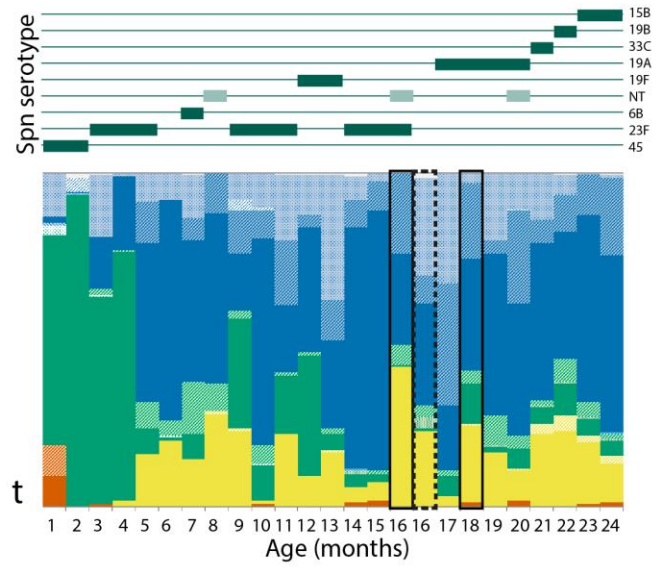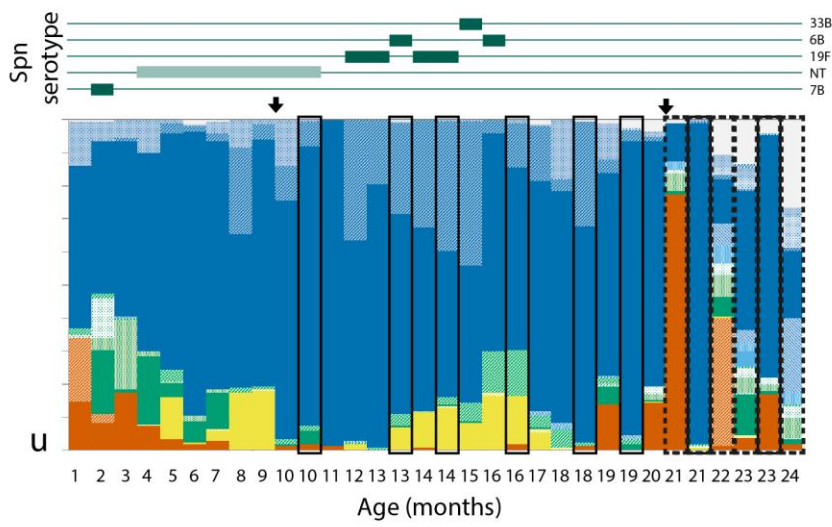

- OTHER
- Unclassified Enterobacteriaceae
- Unclassified Pasteurellaceae
- Haemophilus
- Actinobacillus
- Pseudomonas
- Moraxella\_clade\_II
- Moraxella\_clade\_I
- Acinetobacter
- Burkholderia
- Neisseria
- Helcococcus
- Staphylococcus
- Dolosigranulum
- Other Streptococcus
- Streptococcus\_clade\_I
- Unclassified Flavobacteriaceae
- Unclassified Flavobacteriaceae clade I
- Prevotella
- Corynebacterium\_clade\_II
- Corynebacterium\_clade\_I
