# Supplementary material for: A longitudinal study of the infant nasopharyngeal microbiota: The effects of age, illness and antibiotic use in a cohort of South East Asian children
Source: PLoS Negl Trop Dis. 2017 Oct 2;11(10):e0005975. doi: 10.1371/journal.pntd.0005975 (PMC5638608; doi:10.1371/journal.pntd.0005975)
Supplement: S4 Table — (XLSX) [file pntd.0005975.s010.xlsx]

## Sheet: Sheet1
Supplementary table S4: Participant information
Infant code	Sex	Low birth weight *	Premature birth **	Home delivery ***	Mode of delivery ****	Number of rooms in house	House fire ¤	Does the mother smoke	Household members excluding the participant:					Episodes of pneumonia	Antibiotic treatments	Total OTUs §	Median OTU count §§	Age of first detection by 16S (months)
									Total	Under 5 years	5 to 14 years	15 to 59 years	60 years or over	during study period	during study period			Dolosigranulum	Coryn I	Coryn II
ARI0002	FEMALE	No	No	Yes	V	1	Yes	No	7	1	3	3	0	8	14	91	7.5	2	1	1
ARI0031	FEMALE	No	No	No	V	2	Yes	No	3	0	1	2	0	0	3	41	6.5	1	1	1
ARI0073	MALE	No	No	No	V	4	Yes	No	4	1	1	2	0	2	6	57	7	3	1	1
ARI0106	FEMALE	No	No	No	V	2	Yes	No	6	0	2	4	0	3	4	27	6	1	5	1
ARI0129	FEMALE	No	No	Yes	V	1	Yes	Yes	8	1	4	3	0	0	0	35	7	1	1	2
ARI0141	FEMALE	No	No	No	V	1	Yes	No	2	0	0	2	0	2	2	30	6	1	1	1
ARI0179	MALE	No	No	Yes	V	1	Yes	Yes	5	1	2	2	0	0	1	45	9	7	1	1
ARI0203	FEMALE	Yes	No	No	V	2	Yes	No	9	1	2	5	1	0	2	33	7	3	1	3
ARI0218	FEMALE	Yes	Yes	No	V	1	No	Yes	10	2	4	4	0	8	9	60	6	5	3	1
ARI0237	MALE	No	No	No	V	2	Yes	No	5	1	1	3	0	1	2	48	8	1	1	1
ARI0328	FEMALE	No	No	No	V	1	Yes	No	3	0	0	3	0	2	3	35	5	12	1	1
ARI0372	FEMALE	No	No	Yes	V	2	Yes	No	5	2	1	2	0	0	0	27	7	1	1	1
ARI0410	FEMALE	Yes	No	No	C	2	Yes	Yes	6	1	1	3	1	3	5	57	9	1	4	1
ARI0450	FEMALE	No	No	No	V	2	Yes	Yes	6	1	2	2	1	2	2	72	7	4	1	1
ARI0464	FEMALE	No	No	No	V	1	Yes	No	4	0	1	2	1	2	2	63	8	1	1	1
ARI0483	FEMALE	No	No	No	V	1	Yes	No	5	1	2	2	0	5	5	52	8.5	5	2	1
ARI0484	MALE	No	No	Yes	V	2	Yes	Yes	6	2	2	2	0	0	0	39	8	2	2	1
ARI0501	FEMALE	No	No	Yes	V	1	Yes	No	2	0	0	2	0	0	1	44	7.5	2	1	1
ARI0585	FEMALE	No	No	No	V	2	Yes	No	5	0	3	2	0	6	9	40	7	2	2	1
ARI0604	FEMALE	No	No	No	V	2	Yes	No	4	0	2	2	0	2	2	26	7	16	1	1
ARI9998	MALE	No	No	No	C	2	Yes	Yes	6	1	1	3	1	1	1	37	9	13	1	1
* low birth weight defined as <2.5kg
** premature birth date defined as before 37 weeks gestation
*** home delivery defined as birth taking place outside of the clinic environment
**** mode of delivery: V vaginal delivery, C caesarean section
¤ presence of an open fire in the house
§ total number of OTUs detected in all samples from the participant. OTUs from subsampled data.
§§ median number of OTUs per sample
